# Supplementary figures and images for: An electrosynthesis–recrystallization method for preparing silver acetate: application in silver metal–organic decomposition inks
Source: Royal Society of Chemistry journal article supplement (doi:10.1039/d5nr04847h), 2026-01-01

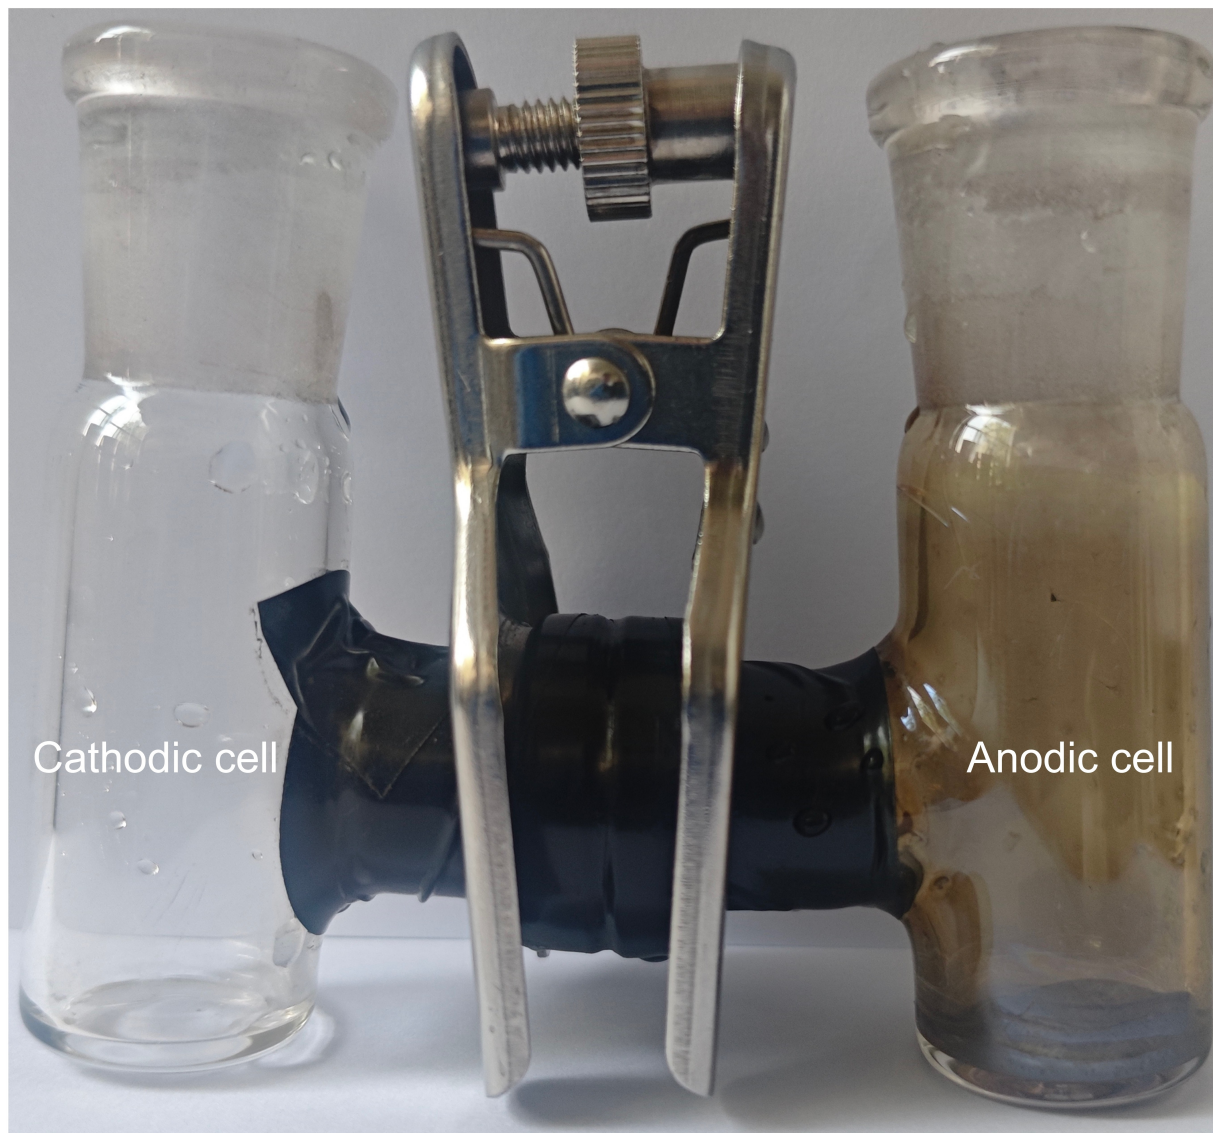

Supplement: d5nr04847h5.pdf [file d5nr04847h5.pdf]

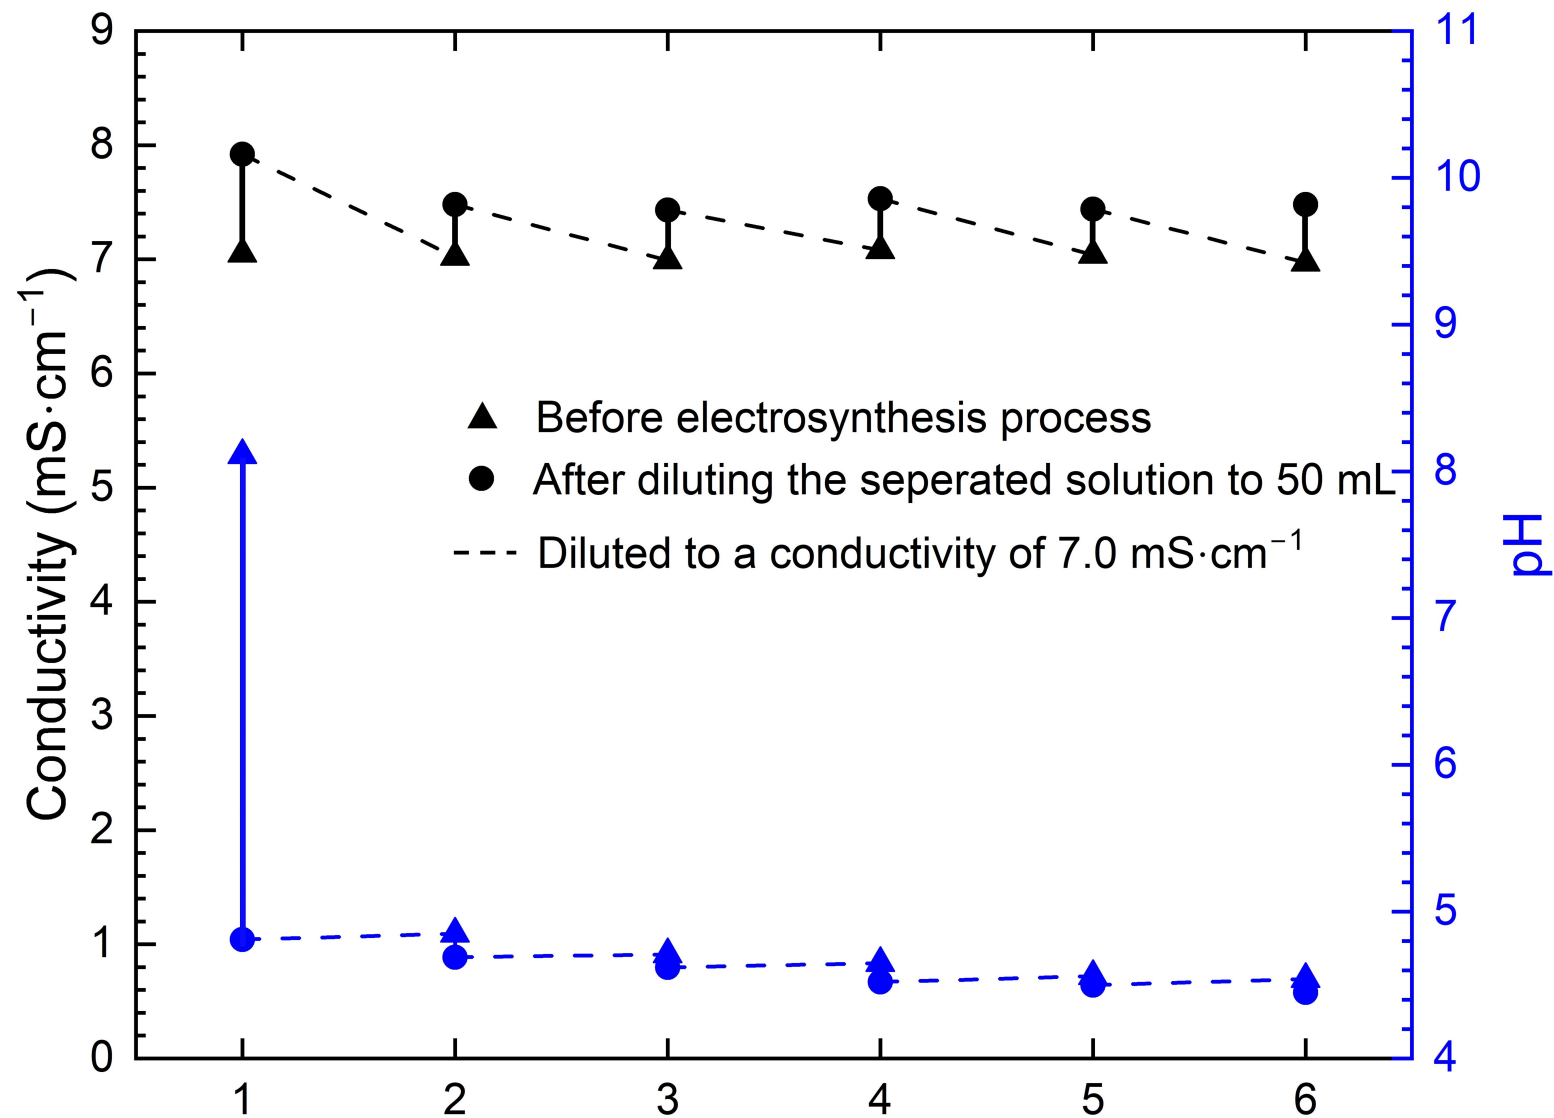

Supplement: d5nr04847h9.pdf [file d5nr04847h9.pdf]
